# Supplementary material
Source: Springer Nature journal article supplement (https://www.springermedizin.de/resource/supplementary/12891_2013_2013_MOESM4_ESM.pdf/9509724)
Supplement: MOESM4 [file 9509724]

|                                                                                 |                                                                                                                                                                                                                                                                     |
|---------------------------------------------------------------------------------|---------------------------------------------------------------------------------------------------------------------------------------------------------------------------------------------------------------------------------------------------------------------|
| Pubmed: <b>788</b>                                                              |                                                                                                                                                                                                                                                                     |
|                                                                                 | 694 excluded (off topic)                                                                                                                                                                                                                                            |
| Screen (title/abstract)<br>(LvT and MB): <b>96</b>                              |                                                                                                                                                                                                                                                                     |
|                                                                                 | 60 excluded<br>(off topic, clearly wrong relation)                                                                                                                                                                                                                  |
| Potentially relevant studies screened (full article) (LvT and MB): <b>36</b>    |                                                                                                                                                                                                                                                                     |
|                                                                                 | 21 excluded because: <ul style="list-style-type: none"> <li>- no comparison with core set measures (n=8)</li> <li>- review (n=5)</li> <li>- qualitative study (n=1)</li> <li>- no PRO (n=3)</li> <li>- no stiffness measure (n=3)</li> <li>- no RA (n=1)</li> </ul> |
| Studies identified through reference checking/citation tracking (LvT): <b>1</b> |                                                                                                                                                                                                                                                                     |
| Final screen of studies on validity of stiffness as a PRO: <b>16</b>            |                                                                                                                                                                                                                                                                     |
|                                                                                 | 14 excluded because no data on low disease activity (additional file 2)                                                                                                                                                                                             |
| <b>2</b> studies included in systematic review                                  |                                                                                                                                                                                                                                                                     |
